1 **INTRACELLULAR PASSAGE OF Na<sup>+</sup> IN AN ACTIVE STATE G-PROTEIN**  
2 **COUPLED RECEPTOR**  
3

4 Owen N. Vickery<sup>1,2</sup>, Catarina A. Carvalheda<sup>1,2</sup>, Saheem A. Zaidi<sup>3</sup>, Andrei V. Pislakov<sup>1,2</sup>,  
5 Vsevolod Katritch<sup>3,4</sup>, Ulrich Zachariae<sup>1,2,\*</sup>  
6

7 <sup>1</sup>School of Life Sciences, University of Dundee, Dundee DD1 5EH, UK.

8 <sup>2</sup>School of Science and Engineering, University of Dundee DD1 4NH, UK.

9 <sup>3</sup>Departments of Biological Sciences and <sup>4</sup>Chemistry, Bridge Institute, University of  
10 Southern California, Los Angeles, CA 90089, USA

11 \*Corresponding author; email: [u.zachariae@dundee.ac.uk](mailto:u.zachariae@dundee.ac.uk)  
12  
13  
14

15 **ABSTRACT**  
16

17 Playing a central role in cell signalling, GPCRs have evolved into the largest superfamily of  
18 membrane proteins and form the majority of drug targets in humans. How extracellular  
19 agonist binding triggers the activation of GPCRs and associated intracellular effector  
20 proteins remains, however, poorly understood. High resolution structural studies have  
21 recently revealed that inactive class-A GPCRs harbour a conserved binding site for Na<sup>+</sup> ions  
22 in the centre of their transmembrane domain, accessible from the extracellular space. Here,  
23 we show that the opening of a conserved hydrated channel in the activated state receptors  
24 allows the Na<sup>+</sup> ion to egress from its binding site into the cytosol. Coupled with protonation  
25 changes, this ion movement occurs without significant energy barriers, and can be driven by  
26 physiological transmembrane ion and voltage gradients. We propose that Na<sup>+</sup> ion exchange  
27 with the cytosol is a key step in GPCR activation, which locks receptors in long-lived  
28 active-state conformations.  
29  
30  
31  
32  
33  
34  
35

## 36 INTRODUCTION

37 G-protein coupled receptors (GPCRs) mediate the transfer of external ligand binding  
38 information across the plasma membrane to activate a range of intracellular signaling  
39 pathways (Pierce, Premont, & Lefkowitz, 2002). Playing a central role in regulation of  
40 vital biological systems, including nervous, cardiovascular, immune, digestive,  
41 reproductive etc., they represent the majority of membrane proteins in humans and the  
42 largest class of present drug targets (Overington, Al-Lazikani, & Hopkins, 2006; Rask-  
43 Andersen, Masuram, & Schiöth, 2014). In recent years, a number of crystal structures have  
44 been solved to reveal conformational changes between inactive and active state receptors,  
45 including common movement in transmembrane helices and conserved microswitches  
46 (Katritch, Cherezov, & Stevens, 2013; Venkatakrishnan et al., 2013). However, despite  
47 this wealth of structural information, it is still not fully understood how ligand binding  
48 leads to activated receptors, which are able to trigger nucleotide exchange in intracellular  
49 effector G-protein complexes.

50 One of the major unknowns is the role of the highly conserved hydrophilic water-filled  
51 channel observed in crystal structures of class A GPCRs, which extends along the receptor  
52 axis from the external ligand binding region nearly all the way to the effector binding site.  
53 The channel is sealed towards the cytoplasm by a thin layer of hydrophobic residues in  
54 inactive state GPCRs (Fig 1A,B). Structures of high resolution, crystallized in the inactive  
55 conformation, reveal a Na<sup>+</sup> ion near the floor of this pocket, coordinated by water and  
56 three or four conserved residues including an acidic aspartate that is fully conserved in all  
57 ligand-sensing class A GPCRs (Christopher et al., 2013; Fenalti et al., 2014; Kruse et al.,  
58 2012; Liu et al., 2012; Miller-Gallacher et al., 2014; Pardo, Deupi, Dölker, López-  
59 Rodríguez, & Campillo, 2007; Zhang et al., 2012) (D<sup>2.50</sup>; superscript refers to the  
60 Ballesteros and Weinstein residue numbering system) (Isberg et al., 2015). The allosteric  
61 effect of monovalent cations, in particular Na<sup>+</sup> ions, for GPCR function has been known  
62 for almost half a century (Pert & Synder, 1974), and the bulk of recent evidence shows that  
63 these effects are largely mediated by the ion binding at the D<sup>2.50</sup> site at the physiological  
64 concentration of Na<sup>+</sup> (140 mM and lower) (Fenalti et al., 2014; Liu et al., 2012; Massink et  
65 al., 2015). Due to the highly conserved nature of D<sup>2.50</sup> and other Na<sup>+</sup> ion coordinating  
66 residues, Na<sup>+</sup> ion binding at this site is likely to be a ubiquitous feature shared by the vast  
67 majority of class A GPCRs (Katritch et al., 2014).

68

69 In active receptor conformations, the ion binding site near D<sup>2.50</sup> shows a collapsed state,  
70 which is likely not optimal for Na<sup>+</sup> ion binding (Huang et al., 2015; Kruse et al., 2013; Liu  
71 et al., 2012; Rasmussen et al., 2011). It was therefore proposed that Na<sup>+</sup> ion leaves the  
72 hydrophilic pocket upon receptor activation by a ligand or during receptor-G-protein  
73 complex formation. However, how this movement is triggered and which pathway is  
74 followed by the ion remains unknown.

75 Here, we investigated the link between ligand-induced receptor activation, the fate of the  
76 bound Na<sup>+</sup> ion in class A GPCRs and its implications for transmembrane (TM) signal  
77 transduction by equilibrium and non-equilibrium atomistic simulations on the M2  
78 muscarinic receptor (m2r). When one addresses these questions, it is important to take  
79 physiologically relevant electrochemical membrane conditions into consideration. Strong  
80 TM Na<sup>+</sup> and K<sup>+</sup> gradients produce a sizable voltage across the plasma membrane of up  
81 to -100 mV in the resting state of mammalian cells (Kandel, Schwartz, & Jessell, 2000).  
82 Both the ionic gradients and electric field have been shown to influence the function of  
83 GPCRs (Ben-Chaim et al., 2006; Navarro-Polanco et al., 2011; Rinne, Mobarec, Mahaut-  
84 Smith, Kolb, & Bunemann, 2015) and are likely to impact the movement of the Na<sup>+</sup> ion  
85 within the membrane region.

86 Our data reveal that the Na<sup>+</sup> ion observed in the TM domain of class A GPCRs can readily  
87 traverse the receptor and, driven by the electrochemical gradients, migrate into the  
88 cytoplasm in active receptor conformations. This result implies that a Na<sup>+</sup> ion may be  
89 exchanged from the extracellular space to the cytoplasm as an important step in receptor  
90 activation. Furthermore, the movement of Na<sup>+</sup> in the receptor, and intracellular egress, are  
91 coupled to a protonation change of D<sup>2.50</sup>.

92

## 93 **RESULTS**

### 94 ***GPCR activation opens a hydrated pathway across the receptor***

95 We were first interested whether the conformational change from the inactive to active  
96 receptor state renders the ion binding pocket sterically incapable of accommodating a Na<sup>+</sup>  
97 ion. The binding site for Na<sup>+</sup> appears to adopt a collapsed conformation in active crystal  
98 structures. We started from an inactive state structure of the m2 muscarinic acetylcholine  
99 receptor (m2r, PDB ID: 3UON) and, using a targeted molecular dynamics (MD) approach,  
100 gently drove this conformation to the active state of this receptor (PDB ID: 4MQT) (Fig S1).

101 Our simulations show that the active state of m2r initially retains sufficient space for the ion.  
102 The electrostatic attraction between the ion and the negatively charged side chain of D69<sup>2.50</sup>  
103 keeps the ion bound to this site during and after the transition from the inactive to the active  
104 receptor conformation (Fig S2). However, our simulations show a widening of the  
105 intracellular portion of the TM helices below the hydrophilic pocket during this  
106 conformational change, which subsequently becomes fully hydrated (Fig 1B). The hydrated  
107 pathway forms a connection between the orthosteric ligand-binding site, the hydrophilic  
108 pocket and the G-protein binding site. The slim hydrophobic layer that delimits the  
109 hydrophilic pocket towards the G-protein binding site in the inactive crystal structure  
110 undergoes substantial conformational changes, which are especially evident from the  
111 sidechain position of Y440<sup>7.53</sup>. Our simulations show two major conformations of the  
112 Y440<sup>7.53</sup> sidechain following the transition – an upward state similar to the conformation  
113 observed in the inactive crystal structure (PDB: 3UON; Fig S3B) and a downward  
114 configuration, which is also seen in the active crystal structure (PDB: 4MQT; Fig S3A). The  
115 formation of a hydrated pathway connecting the receptor ligand and effector binding sites  
116 has been reported in previous simulation studies on the A<sub>2A</sub>R and 5-HT<sub>1A</sub> receptors (Yuan,  
117 Filipek, Palczewski, & Vogel, 2014; Yuan, Peng, Palczewski, Vogel, & Filipek, 2016),  
118 however the previous reports did not take the presence of a Na<sup>+</sup> ion into consideration.

119

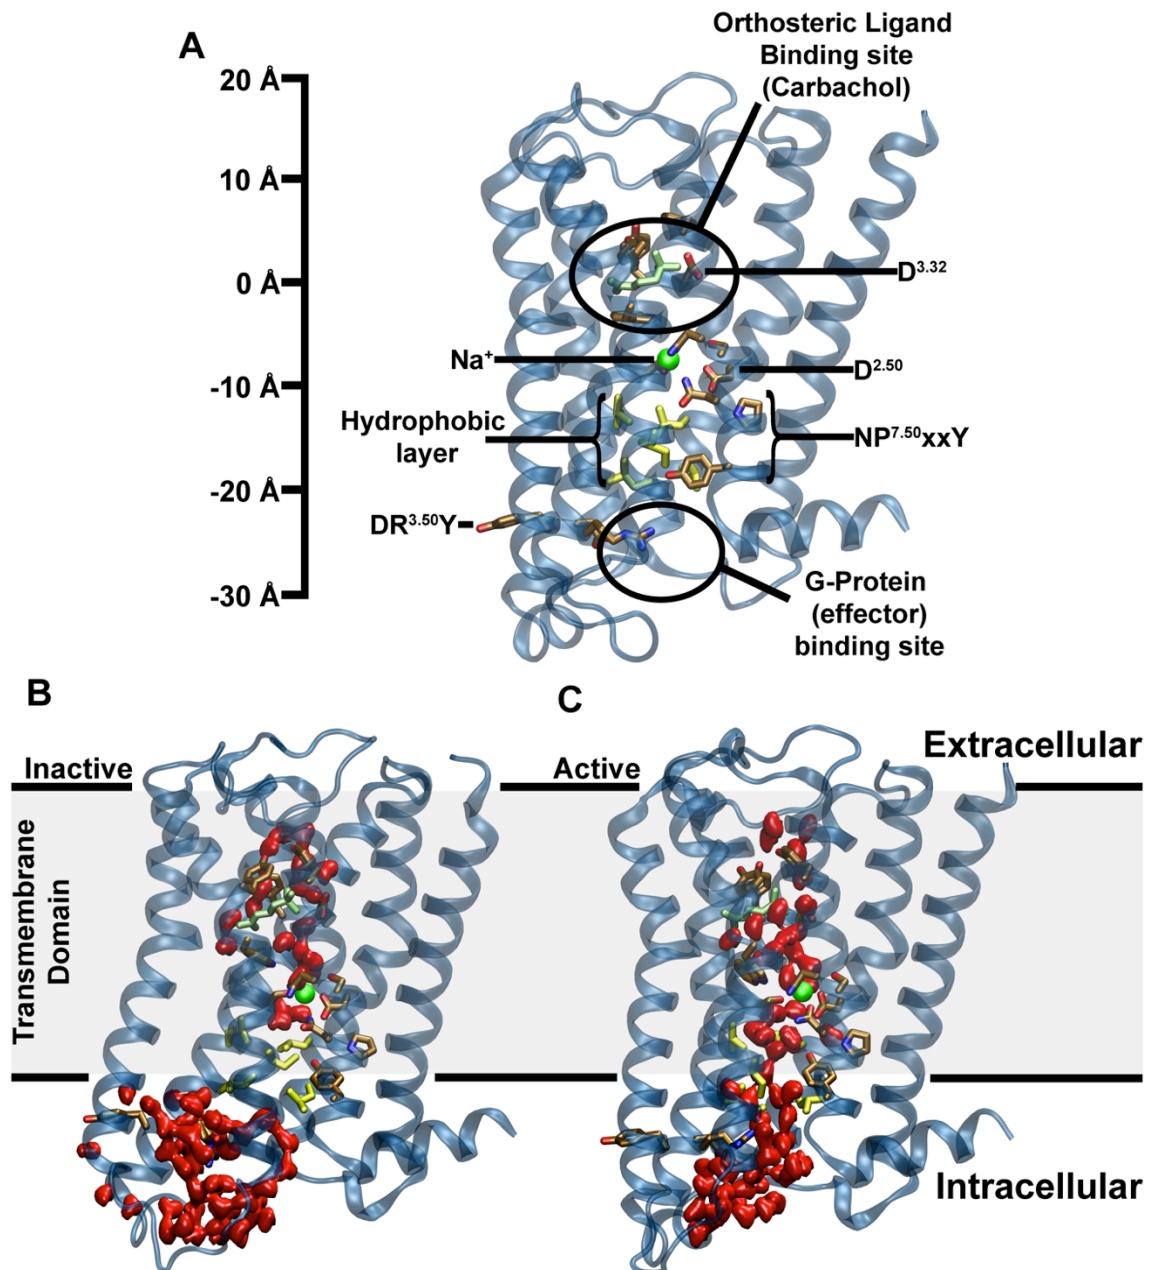

120 **Figure 1: Major structural features and internal hydration of class A GPCRs in the inactive**  
121 **and active state as shown by the m2r. (A)** The main structural features of class A GPCRs, as  
122 exemplified by the m2r, include 7 TM helices (blue), an extracellular ligand binding site, the  
123 intracellular effector (G-protein) binding site as well as conserved and functionally important  
124 residues termed microswitches (selected ones are highlighted). The scale bar shown and all  
125 positions stated in the text use the C $\alpha$  atom of D103<sup>3.32</sup> as reference. **(B)** Conformation of inactive  
126 m2r (PDB: 3UON) during the simulations showing the presence of the hydrophobic layer  
127 separating the hydrophilic pocket and effector binding site. **(C)** After transition to the active state  
128 (PDB: 4MQT), and further simulation, m2r displays a continuous water channel connecting the  
129 orthosteric ligand binding site, hydrophilic pocket and effector binding site. Water molecules are  
130 shown in red (surface representation), the position of the allosteric Na<sup>+</sup> ion, as obtained from our  
131 initial simulations, is shown as a green sphere, and residues forming the hydrophobic layer  
132 (yellow) as well as the bound ligand (carbachol, light green) are depicted in stick representation.  
133

134 ***The position of the internal Na<sup>+</sup> ion is coupled to protonation of D69<sup>2.50</sup>***

135 We were next interested in the interplay between the Na<sup>+</sup> ion and the key conserved  
136 titratable residue D69<sup>2.50</sup>. A number of computational studies have explored functional  
137 implications of the protonation state of D<sup>2.50</sup>, in particular its role in receptor activation, Na<sup>+</sup>  
138 ion binding, and interaction with the “ionic lock” motif (D<sup>3.49</sup>R<sup>3.50</sup>Y<sup>3.51</sup>) in several class A  
139 family GPCRs (Miao, Caliman, & McCammon, 2015; Ranganathan, Dror, & Carlsson,  
140 2014; Vanni, Neri, Tavernelli, & Rothlisberger, 2010). Here, we focused on a potential  
141 coupling between the position of the Na<sup>+</sup> ion within the receptor and protonation of D69<sup>2.50</sup>.  
142 We carried out pK<sub>a</sub> calculations on D69<sup>2.50</sup> using more than 800 equilibrated frames from  
143 simulations of the m2r receptor in a variety of conformations, including both the upward  
144 and downward configurations of the Y440<sup>7.53</sup> side chain. Due to the formation of a hydrated  
145 pathway across the receptor from the ligand to the effector binding sites in the active state  
146 simulations, we were able to evaluate the effect of the Na<sup>+</sup> ion positional changes on the  
147 D69<sup>2.50</sup> pK<sub>a</sub>, where the Na<sup>+</sup> ion was shifted both in the upward (towards the extracellular  
148 face) and downward direction.

149 Figure 2 shows that the pK<sub>a</sub> value and, thus, the most likely protonation state of D69<sup>2.50</sup> are  
150 strongly influenced by the Na<sup>+</sup> ion. If the cation is within ~3-5Å of D69<sup>2.50</sup>, its positive  
151 charge strongly stabilises the negatively charged form of D69<sup>2.50</sup>, leading to a pK<sub>a</sub> value of  
152 ~3-4. However, displacement of the Na<sup>+</sup> ion to distances of 5Å and greater gives rise to a  
153 substantial pK<sub>a</sub> shift to values between 8-12. This can be understood given the location of  
154 D69<sup>2.50</sup> in the middle of the transmembrane domain, surrounded by many non-polar  
155 residues. Transient movements of the internal Na<sup>+</sup> ion from its binding site, facilitated by  
156 activation-related conformational changes in the Na<sup>+</sup> pocket, can therefore be sufficient to  
157 lead to protonation of D69<sup>2.50</sup>.

158  
159  
160



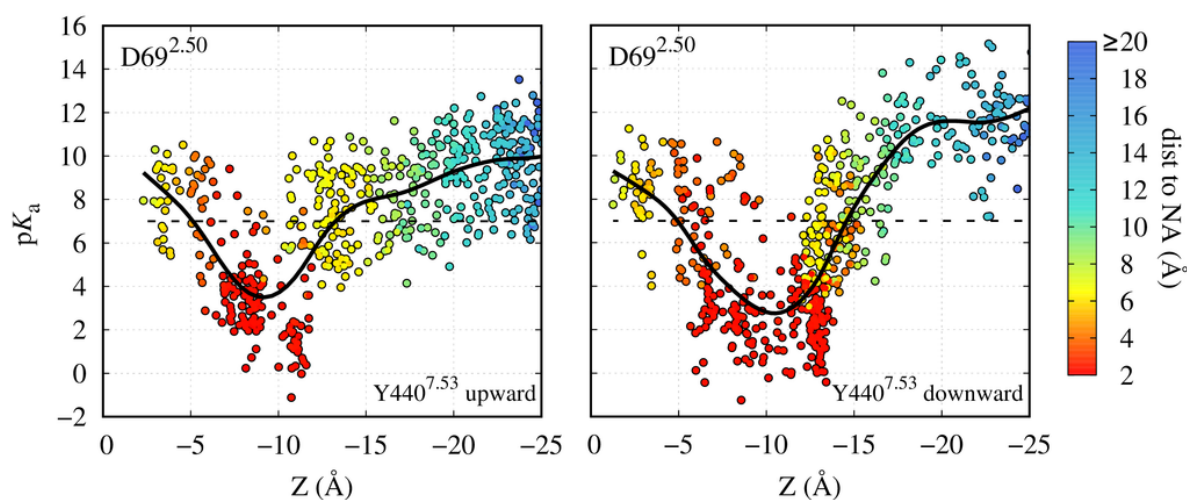

161

162 **Figure 2: Proximity of the Na<sup>+</sup> ion modulates protonation of D69<sup>2.50</sup>.**

163 Continuum electrostatics calculations of the pK<sub>a</sub> of the D69<sup>2.50</sup> sidechain using a multitude of m2r  
164 conformations obtained from our atomistic simulations in the carbachol-bound active state, both for  
165 Y440<sup>7.53</sup> in the upward (left) and downward (right) conformations. The pK<sub>a</sub> is shown as a function of  
166 Z, the separation between the Na<sup>+</sup> ion and the C<sub>α</sub> atom of D103<sup>3.32</sup>, which marks the orthosteric  
167 ligand binding pocket, along the TM axis (see Fig 1A). The data points are in addition coloured  
168 according to their distance to the D69<sup>2.50</sup> sidechain. The black continuous line, a smoothed spline fit,  
169 indicates the approximate average pK<sub>a</sub> for each separation for illustrative purposes, and the dashed  
170 black line shows a pK<sub>a</sub> of 7.

171

172

173 For the protonation of D<sup>2.50</sup>, we propose that the most likely proton entry route would be  
174 from the extracellular side, along the negative membrane potential gradient. Moreover, in  
175 the m2r and other aminergic receptors the proton could be transferred from the conserved  
176 D<sup>3.32</sup> in the orthosteric binding pocket via a short chain of water molecules (Isom &  
177 Dohlman, 2015). In the apo state, our calculations in m2r indicate that D<sup>3.32</sup> is generally  
178 protonated (pK<sub>a</sub> = 11.2±1.7), whereas upon ligand binding the pK<sub>a</sub> is substantially lowered  
179 (pK<sub>a</sub> = 7.6±1.9). A possible protonation change of D<sup>3.32</sup> could thus facilitate the shuttling of  
180 protons to D<sup>2.50</sup>. Furthermore, if a G-protein complex with a receptor is preformed before  
181 agonist binding, D<sup>2.50</sup> would be readily accessible for protonation from the extracellular side  
182 via a hydrated pathway. In this context, it has further been argued that bound agonists, but  
183 not antagonists, may sustain the hydrated pathway past the ligand which connects the  
184 extracellular space with the Na<sup>+</sup> ion binding site upon receptor activation (Yuan et al.,  
185 2016).

186

187 ***Simulations under electrochemical gradient show ion movement to the intracellular face***

188 Next we conducted atomistic simulations with the Computational Electrophysiology  
189 (CompEL) protocol (Kutzner et al., 2016) on the active conformation of m2r. We applied a  
190 physiological Na<sup>+</sup> ion gradient of 150:10mM across the membrane from the extracellular to  
191 the intracellular side, in addition to a small ion imbalance evoking a hyperpolarised V<sub>m</sub> at -  
192 250mV. Due to the wide range of pK<sub>a</sub> values that D69<sup>2.50</sup> can adopt, its sidechain was  
193 modeled both in charged and neutral forms.

194 Our simulations at -250 mV show that the Na<sup>+</sup> ion exhibits a substantial degree of mobility  
195 even when D69<sup>2.50</sup> is in the charged state (Fig 3A, B, S7). The Na<sup>+</sup> ion is predominantly  
196 coordinated by the residues D69<sup>2.50</sup>, S110<sup>3.39</sup>, N435<sup>7.45</sup> and S433<sup>7.46</sup>. Under a small  
197 membrane voltage, a bimodal distribution of distances between the ion and D69<sup>2.50</sup> is  
198 observed, where larger distances of 5–6 Å are not uncommon (Fig S7C). As our pK<sub>a</sub>  
199 calculations showed that moderate excursions of the ion from its original binding site on  
200 this scale likely have a major impact on the pK<sub>a</sub> and protonation state of the D69<sup>2.50</sup>  
201 sidechain (Fig 2), we investigated the effect of a protonation change of D69<sup>2.50</sup> in the active  
202 conformation.

203 Our simulations reveal that, in this receptor conformation, the Na<sup>+</sup> ion readily passes  
204 through the hydrated channel into the intracellular solution. When D69<sup>2.50</sup> is neutral, we  
205 observe the Na<sup>+</sup> ion to be expelled into the intracellular solution in three out of four  
206 simulations at -250mV (Fig 3A, C, for complete list of trajectories see S4, 7A). At -500mV  
207 the effect is, expectably, even more pronounced and movement into the cytoplasm is seen  
208 in all the simulations we conducted (Fig 3B, D, for complete list of trajectories see S4, 7A).  
209 In contrast, when D69<sup>2.50</sup> is charged, such a transition is observed in only in one out of  
210 eight simulations at a raised membrane voltage (Fig 3B, S7B). The observed translocation  
211 of Na<sup>+</sup> to the intracellular side occurs irrespective of the conformation adopted by Y440<sup>7.53</sup>  
212 (Fig 3C, D, S3).

213 In our simulations as well as under physiological conditions, both TM ion concentration  
214 and voltage gradients drive ion flow across membrane pores. In the case of the Na<sup>+</sup> ion,  
215 both gradients act synergistically in the resting state of the cell, driving the Na<sup>+</sup> ion towards  
216 the cytoplasm. Under the conditions used in the simulations, fast ion motion through the  
217 receptor is predominantly voltage-driven. Converted into an effective force, and using a  
218 linear approximation to describe the gradient across the membrane (Dill & Bromberg,



219 2011), the influence of the concentration gradient would be about 10-fold smaller ( $\sim 1.3$   
220 pN) than the driving force caused by the voltage gradient in these conditions ( $\sim 13$  pN).

221

222

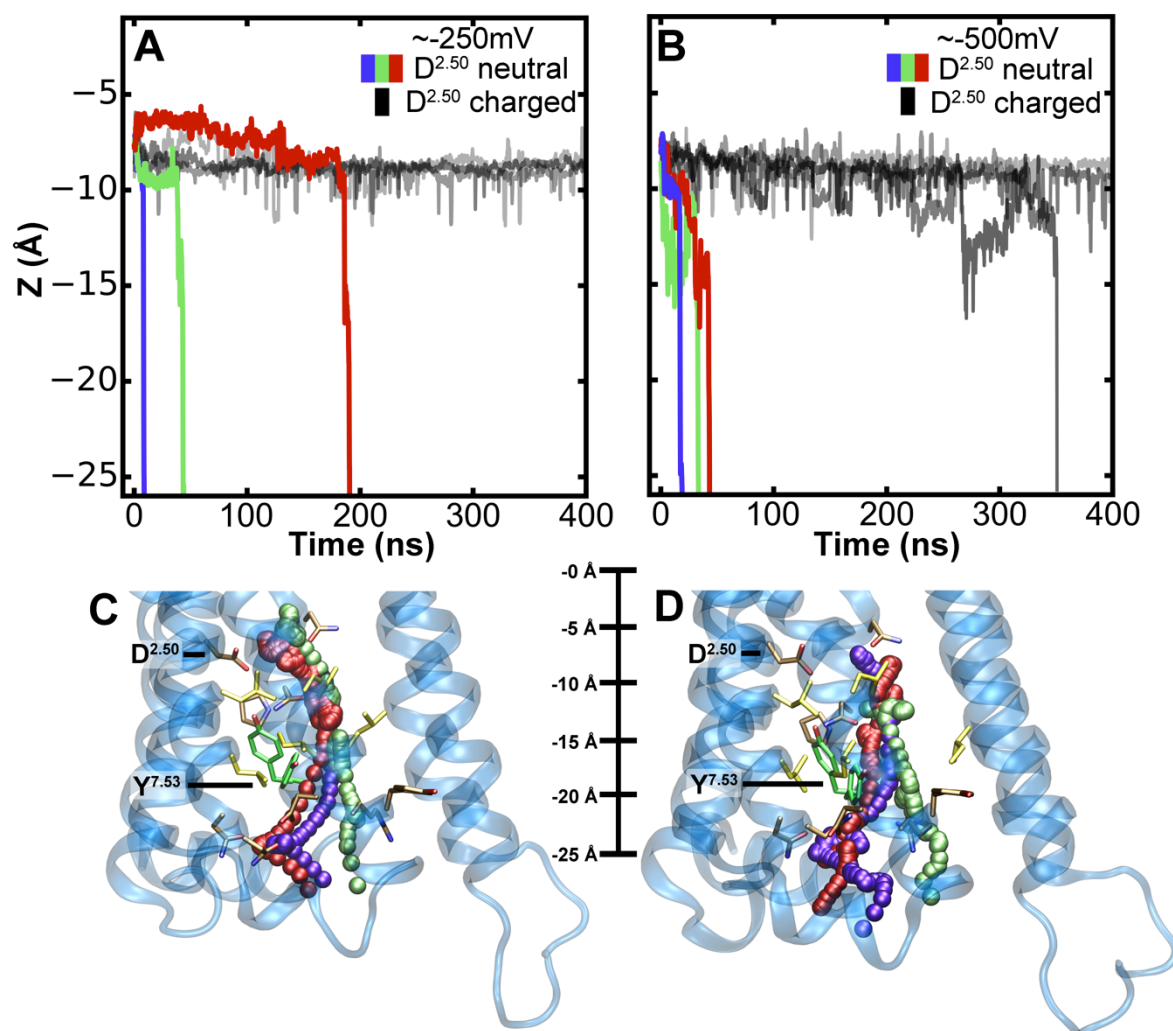

223

224

225

226 **Figure 3: Na<sup>+</sup> ion migration across the receptor to the intracellular side.**

227 Z-coordinate of the Na<sup>+</sup> ion in the m2r under a hyperpolarised  $V_m$  of -250mV (A) and -500mV (B).

228 Black lines denote the simulations with a charged D69<sup>2.50</sup>; the purple, green and red lines display

229 simulations with a neutral D69<sup>2.50</sup>. Here we show a selection of simulations, when D69<sup>2.50</sup> is neutral;

230 the trajectories show full passage of the ion to the intracellular side (for complete list of trajectories

231 see Fig S4, S7). Trajectories of the Na<sup>+</sup> ion moving from the hydrophilic pocket, accessible from the

232 extracellular space, into the intracellular bulk solution at (C) -250mV and (D) -500mV. The colour

233 of the Na<sup>+</sup> ion corresponds to panels A and B respectively. The Y<sup>440</sup><sup>7.53</sup> upward and downward

234 conformations are shown in green. The pathways of the ion towards the intracellular side are almost

235 indistinguishable from each other until the ion passes Y<sup>440</sup><sup>7.53</sup>, thereafter the pathways diverge

236 somewhat due to the widened exit region to the cytoplasm.

237

## 238 *Energetics of ion movement to the cytoplasm*

239 As the initiation of fast movement of ions to the intracellular side was initially tested under  
240 slightly supra-physiological levels of  $V_m$  in our CompEL simulations of active state m2r, we  
241 next evaluated the detailed equilibrium energetics of the  $\text{Na}^+$  ion movement on this pathway  
242 (i.e without applied gradients) to ascertain the physiological relevance of this transition. We  
243 calculated the potential-of-mean-force (PMF) for the migration of the cation in four  
244 different states: in addition to probing the influence of the  $\text{D69}^{2.50}$  protonation state, we  
245 examined the role of the conformation of the  $\text{Y440}^{7.53}$  sidechain, which substantially affects  
246 the width and overall shape of the formed hydrated pathway into the cytoplasm (Fig 3C,D).

247 When  $\text{D69}^{2.50}$  is charged (Fig 4), the free energy difference between the internal the  $\text{Na}^+$  ion  
248 binding site and the free intracellular bulk solution is  $\sim 30$  kJ/mol. Accordingly, the active  
249 conformation of m2r retains a  $\text{Na}^+$  ion at the allosteric site with relatively high affinity, as  
250 long as  $\text{D69}^{2.50}$  remains unprotonated. The major barrier to migration into the cytoplasm is  
251 located near the  $\text{Y440}^{7.53}$  sidechain. In its upward state, the free energy barrier amounts to  
252  $\sim 41$  kJ/mol, while it increases to  $\sim 48$  kJ/mol in the downward state (Fig 4).

253 As our  $pK_a$  calculations showed that even a moderate displacement of the  $\text{Na}^+$  ion away  
254 from its binding site at  $\text{D69}^{2.50}$  is likely to lead to a protonation change of the aspartate, we  
255 also calculated the PMF of the  $\text{Na}^+$  ion movement along the intracellular pathway for neutral  
256  $\text{D69}^{2.50}$ . Importantly, this state no longer shows any affinity for the  $\text{Na}^+$  ion, and ion  
257 movement into the intracellular bulk is not obstructed by any energy barrier significantly  
258 larger than the thermal energy ( $kT$ ,  $\sim 2.5$  kJ/mol) in the upward-oriented  $\text{Y440}^{7.53}$   
259 conformation. When  $\text{Y440}^{7.53}$  is oriented downward, a small but readily surmountable  
260 energy barrier (on physiologically relevant timescales) of  $\sim 14$  kJ/mol exists for this  
261 transition. The downward conformation of  $\text{Y440}^{7.53}$  in conjunction with the neutral state of  
262  $\text{D69}^{2.50}$  also has a small influence on the shape and configuration of the ion binding site at  
263  $\text{D69}^{2.50}$ , which leads to a reduction of the number of hydrogen bonds formed between the  
264 protein and the ion (Fig S5), raising the free energy of binding at this site further by  $\sim 7.5$   
265 kJ/mol (Fig 4A, B).

266  
267

268

269

270

271

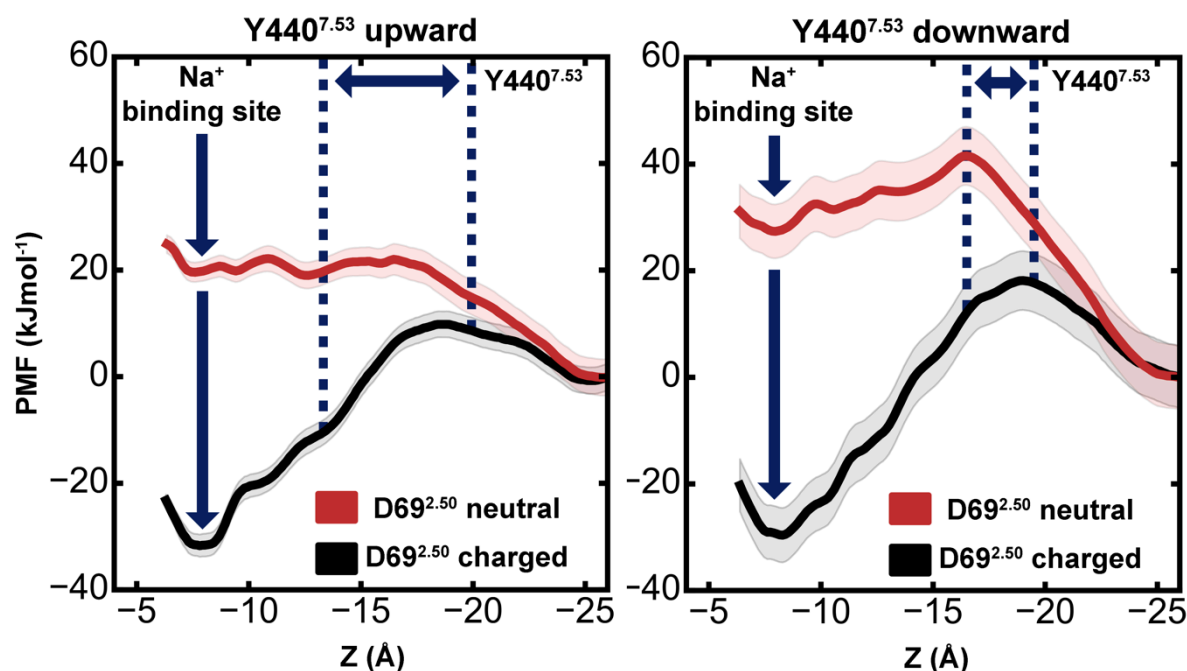

272  
273

274 **Figure 4: Energetics of Na<sup>+</sup> translocation from the hydrophilic pocket to the intracellular side.**  
275 Equilibrium potential of mean force (PMF) profiles of the energetics of Na<sup>+</sup> translocation along the  
276 Z-axis in m2r without any applied voltage or concentration gradients. Four relevant states were  
277 considered: **(Left)** negatively charged D69<sup>2.50</sup> (black) or neutral D69<sup>2.50</sup> (red) with the Y440<sup>7.53</sup>  
278 sidechain in an upward conformation; **(Right)** negatively charged D69<sup>2.50</sup> (black) or neutral D69<sup>2.50</sup>  
279 (red) with a downward-oriented Y440<sup>7.53</sup> sidechain. The standard deviation of the PMF, obtained  
280 from Bayesian bootstrap analysis, is depicted as shaded area. For each PMF, the intracellular bulk  
281 solution was used as a reference, and the range of positions adopted by the Y440<sup>7.53</sup> sidechain is  
282 denoted by blue dotted lines.

283

#### 284 **Conservation of the pocket and intracellular exit channel**

285 Additional support for an important role of intracellular Na<sup>+</sup> egress in the activation of class  
286 A GPCRs is provided by analysis of residue conservation along its exit pathway. As we  
287 detailed previously (Katritch et al., 2014), there is a remarkable level of conservation for the  
288 16 residues of the Na<sup>+</sup> binding pocket in class A GPCRs (Figure 5, Table S1), suggesting  
289 conserved functional role of Na<sup>+</sup> in receptor activation mechanism. Interestingly, our  
290 analysis of Na<sup>+</sup> contacts along the MD trajectories in this study shows that the residues  
291 lining the ion exit path to the intracellular side are well conserved too. Thus, out of the 36  
292 contact residues, 32 are 100% conserved among all five muscarinic receptors, 17 are >90%  
293 conserved among all aminergic receptors, and 22 are consensus residues among all class A  
294 GPCRs. Most importantly, the predicted exit pathway includes Na<sup>+</sup> contacts with the highly  
295 conserved N<sup>1.50</sup> (100% and 98% conserved in aminergic and in all class A respectively),

296 D<sup>3.49</sup> (100% and 64%), Y5.58 (94% and 73%) and other residue positions generally  
297 conserved as polar residues, including N<sup>1.60</sup>, T<sup>2.37</sup> and N<sup>2.39</sup>. Particularly, in the inactive M2  
298 muscarinic receptor and in other inactive state GPCR structures as well, the Y<sup>7.53</sup> residue is  
299 directed towards the Na<sup>+</sup> ion-binding pocket, and hence may play a role as first point of  
300 polar contact outside the Na<sup>+</sup> ion-binding pocket for the intracellular movement of Na<sup>+</sup>. The  
301 Na<sup>+</sup> ion passage towards the cytosol may be further facilitated by other conserved polar  
302 residues, including D<sup>3.49</sup>, N<sup>2.39</sup>, N<sup>2.40</sup> and T<sup>2.37</sup>. Such conservation of the Na<sup>+</sup> ion pocket and  
303 the path for intracellular egress of Na<sup>+</sup> suggests that Na<sup>+</sup> transfer described in this study can  
304 occur in all muscarinic receptors and other class A GPCRs, comprising a key “irreversible”  
305 part of the activation mechanism.

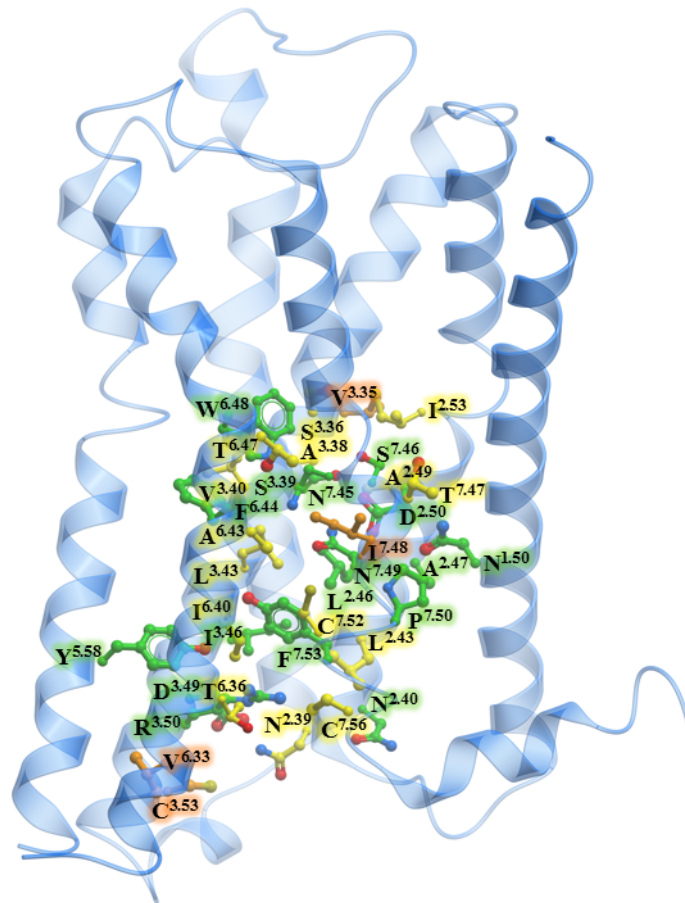

306  
307  
308 **Figure 5: Conservation of the intracellular Na<sup>+</sup> ion pathway.** Muscarinic M2 receptor shown in  
309 blue cartoon representation, along with ball-and-stick representation of residues involved in the  
310 egress of the Na<sup>+</sup> ion. The carbon atoms of 17 residues that are >90% conserved among aminergic  
311 receptors are shown in green, the carbon atoms of additional 15 residues that are conserved among  
312 the muscarinic family of receptors are shown in yellow, the carbon atoms of the 4 non-conserved  
313 residues are shown in orange.

314

## 315 **DISCUSSION**

316 The principal role of GPCRs is to transmit information about an extracellular agonist  
317 binding event towards the cytoplasm, by catalysing GDP release from a bound intracellular  
318 G-protein complex (Pierce et al., 2002). This is known to involve conformational changes in  
319 the receptor, including conserved residue microswitches, and large scale movement of TM  
320 helices 6 and 7 in the intracellular side that open the nucleotide binding site of the  $G\alpha$   
321 protein (Dror et al., 2015; Huang et al., 2015; Mahoney & Sunahara, 2016). It has,  
322 furthermore, long been recognised that G-protein binding, and stabilisation of this  
323 conformation on the intracellular side of the receptor, increases agonist affinity on the  
324 extracellular face (DeVree et al., 2016; Maguire, Van Arsdale, & Gilman, 1976).

325  $Na^+$  ions, binding to an internal receptor site between the G-protein and the external ligand  
326 binding pockets, are known to act as powerful allosteric modulators of class A GPCR  
327 function (Katritch et al., 2014; Pert & Synder, 1974).  $Na^+$  was found to selectively diminish  
328 the affinity of agonists, but not antagonists, to GPCR, which can be interpreted as a  
329 structural stabilisation of the inactive receptor state by the ions (Miller-Gallacher et al.,  
330 2014; Quitterer, AbdAlla, Jarnagin, & Müller-Esterl, 1996; Selley, Cao, Liu, & Childers,  
331 2000). Accordingly, while receptor X-ray structures of sufficient resolution crystallised in  
332 the inactive state display a  $Na^+$  ion bound to  $D^{2.50}$ , this binding site is collapsed in active  
333 receptor conformations, and ions are not observed (Huang et al., 2015; Katritch et al., 2014).  
334 Mutations around the  $Na^+$  ion binding site have a major impact on receptor function in most  
335 class A GPCRs either completely abolishing G-protein activation, or resulting in  
336 constitutive ligand independent or pathway biased signaling (Fenalti et al., 2014; Liu et al.,  
337 2012; Massink et al., 2015).

338 Our work shows that the  $Na^+$  ion binding pocket, which is accessible only from the  
339 extracellular face in the inactive state (Selent, Sanz, Pastor, & de Fabritiis, 2010; Vickery,  
340 Machtens, Tamburrino, Seeliger, & Zachariae, 2016), is transformed into a fully permeable,  
341 water-filled channel in the activated receptor conformation of m2r. This channel bridges the  
342 extracellular ligand and intracellular G-protein binding sites. Water access from the ligand  
343 binding site all the way to the cytoplasmic side of the receptor has previously also been  
344 observed in simulations on the  $A_{2A}R$  and  $5-HT_{1A}$  receptors (Yuan et al., 2014, 2016). We  
345 show here that the activated receptor state permits the  $Na^+$  ion to cross the receptor towards  
346 the cytoplasmic side, without experiencing any major energy barriers. The high hydration  
347 level of this pathway in the active state is thereby an important factor in facilitating ion



348 passage. The correlation between hydration level and ion transfer has previously been  
349 demonstrated in the case of ion channels (Beckstein et al., 2003; Dong, Fiorin, Carnevale,  
350 Treptow, & Klein, 2013; Zhu & Hummer, 2012). In simulations of the inactive state, by  
351 contrast, the application of substantially larger forces seems to be necessary to achieve  
352 inward migration of  $\text{Na}^+$ , as no continuous hydrated channel is formed (Shang et al., 2014).

353 The inward motion of the  $\text{Na}^+$  ion is facilitated by a protonation change of  $\text{D}^{2.50}$  from the  
354 negatively charged to the neutral form, which we show to occur even upon small  
355 displacements of the ion from its equilibrium binding position. Neutralisation of  $\text{D}^{2.50}$   
356 substantially reduces its affinity for  $\text{Na}^+$  ions. Migration of the ion towards the cytosol is  
357 then driven by the negative membrane voltage and by a greater than 10-fold  $\text{Na}^+$  gradient  
358 across the cytoplasmic membrane under physiological conditions, both strongly attracting  
359  $\text{Na}^+$  ions inwards. Indeed, we observe that moderately negative membrane voltages allow  
360 fast escape of the allosteric  $\text{Na}^+$  ion to the cytoplasm on 10–100 ns-timescales in our  
361 simulations.

362

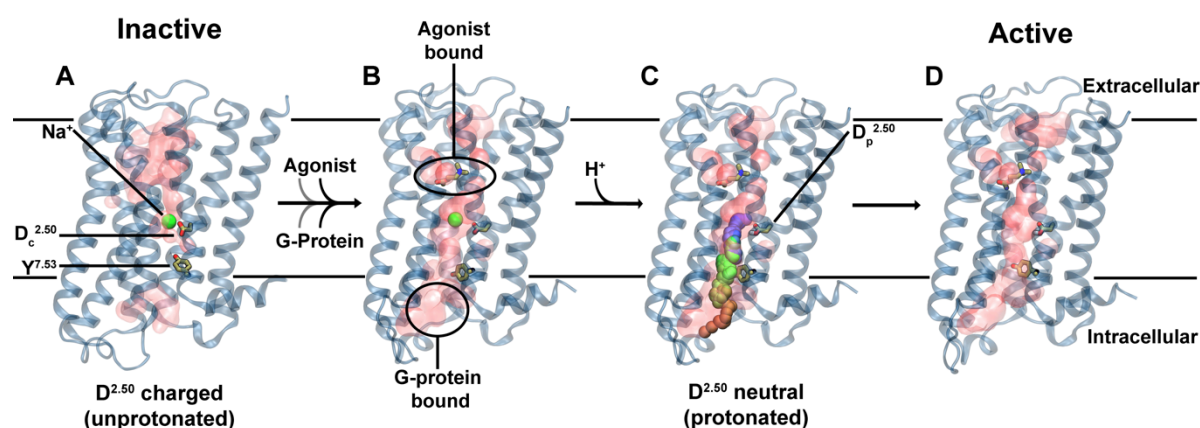

364 **Figure 6: Proposed role of  $\text{Na}^+$  translocation in GPCR activation.** Key checkpoints during the  
365 transition from the inactive (A) to active (D) state of the receptor. (A) The initial, inactive receptor  
366 conformation shows no bound agonist or G-protein, and displays a  $\text{Na}^+$  ion bound in a pocket which  
367 is sealed towards the cytosol by a hydrophobic layer around  $\text{Y}^{7.53}$ . (B) G-protein and agonist bind to  
368 the receptor (in undetermined order), leading to the formation of a continuous water channel across  
369 the GPCR. The increased mobility of the  $\text{Na}^+$  ion results in a  $\text{pK}_a$  shift and subsequent protonation of  
370  $\text{D}^{2.50}$ . (C) Neutralisation of  $\text{D}^{2.50}$  and the presence of the hydrated pathway facilitate transfer of  $\text{Na}^+$   
371 to the intracellular side, which is driven by the transmembrane  $\text{Na}^+$  gradient and the membrane  
372 voltage. (D) The expulsion of  $\text{Na}^+$  towards the cytosol results in a prolonged active state of the  
373 receptor.

374



375 According to our results, conformational changes associated with agonist binding from the  
376 extracellular side and/or G-protein binding from the cytoplasm alter the Na<sup>+</sup> site  
377 conformation and the dynamics of the Na<sup>+</sup>-D<sup>2.50</sup> salt bridge. This, in turn, leads to a  
378 protonation change of this residue, and subsequent egress of the Na<sup>+</sup> ion via a hydrated exit  
379 channel to the intracellular side. We therefore suggest that intracellular Na<sup>+</sup> ion transfer,  
380 facilitated by the membrane potential and Na<sup>+</sup> gradient, is a pivotal step during receptor  
381 activation, as it traps the receptor in the active state (Fig 6). It has been shown that, once  
382 activated, GPCRs remain in a prolonged active state, capable of signalling even when the  
383 receptors are internalized from the cytoplasmic membrane during endocytosis (Irannejad et  
384 al., 2013; Thomsen et al., 2016). The crucial role of the Na<sup>+</sup> ion movement within the  
385 receptor is reflected by the nearly complete conservation of the Na<sup>+</sup> ion binding site in class  
386 A GPCRs as well as the high conservation level of the exit pathway. The mechanism  
387 suggested here is also consistent with agonist independent basal signalling of GPCRs  
388 (Kobilka & Deupi, 2007), explaining this phenomenon as spontaneous protonation of D<sup>2.50</sup>  
389 and egress of the bound Na<sup>+</sup> ion on the intracellular pathway, leading to receptor activation.

390 Charge movements within membrane proteins, such as the coupled transfer of Na<sup>+</sup> ions and  
391 protons suggested by our MD simulations and pK<sub>a</sub> calculations, should be sensitive to the  
392 membrane voltage. Indeed, it has been demonstrated that GPCR signalling is modulated by  
393 membrane voltage changes (Ben-Chaim et al., 2006; Mahaut-Smith, Martinez-Pinna, &  
394 Gurung, 2008; Martinez-Pinna, Tolhurst, Gurung, Vandenberg, & Mahaut-Smith, 2004;  
395 Moreno-Galindo, Alamilla, Sanchez-Chapula, Tristani-Firouzi, & Navarro-Polanco, 2016;  
396 Rinne et al., 2015; Vickery, Machtens, Tamburrino, et al., 2016). This applies both to the  
397 conformation of the receptors as well as their transmitted signal. Our findings are therefore  
398 consistent with these observations, as they suggest that movement of ions in the receptors  
399 constitute a key element in the receptor activation process. The observed voltage regulation  
400 of GPCRs is of particular relevance for receptors expressed in electrically excitable  
401 cells (Heifetz, James, Morao, Bodkin, & Biggin, 2016). In these cell types, the membrane  
402 voltage undergoes large-scale oscillations during action potentials. The transmitted receptor  
403 signal could thereby be tuned depending on the specific cell type and its excitation status  
404 (Vickery, Machtens, & Zachariae, 2016). Crucially, many GPCR drug targets are located in  
405 excitable tissue in the brain or muscle, where voltage regulation and a differential response  
406 to drugs may play an important role.

407 To summarise, our results suggest a model for class A GPCR activation, in which  
408 conformational changes induced by G-protein and agonist binding are accompanied by the  
409 intracellular transfer of an internally bound Na<sup>+</sup> ion. Importantly, these conformational  
410 changes encompass rearrangement of the sidechain of Y<sup>7.53</sup>, a conserved receptor  
411 microswitch (Katritch et al., 2013), which in its upward state allows nearly barrier-free  
412 intracellular permeation of Na<sup>+</sup> ions. This observation forms a functional link between the  
413 major Na<sup>+</sup> binding site D<sup>2.50</sup> and Y<sup>7.53</sup> as the first polar point of contact on the intracellular  
414 migration pathway of the Na<sup>+</sup> ion. Translocation of the ion is further facilitated by  
415 protonation of the conserved D<sup>2.50</sup> residue (Fig 6), and driven by the physiological  
416 membrane Na<sup>+</sup> and voltage gradients. The voltage sensitivity of GPCRs, which has been  
417 previously reported for many receptors (Vickery, Machtens, & Zachariae, 2016), would thus  
418 be a natural consequence of an activation mechanism which incorporates the movement of  
419 ions as a key element. The Na<sup>+</sup> free receptors are likely to be trapped in an active state,  
420 potentially explaining the prolonged mechanisms of signalling observed in many GPCRs.

421

## 422 **METHODS**

423

424 The simulation systems for the m2r were constructed using the crystal structures (PDB:  
425 3UON, 4MQT)(Haga et al., 2012; Kruse et al., 2013). Ligands and non-GPCR subunits  
426 were removed. The missing loop ICL3 was modelled using Modeller (v9.14)(Šali &  
427 Blundell, 1993). For both simulation systems all internal water molecules and ions were  
428 retained. The charged N- and C-termini were capped using acetyl and methyl moieties,  
429 respectively. All ionisable groups were simulated with default protonation states, unless  
430 otherwise mentioned. Each receptor was embedded into an equilibrated and hydrated 1,2-  
431 palmitoyl-oleoyl-sn-glycero-3-phosphocholine (POPC) lipid bilayer using the GROMACS  
432 utility `g_membed` (Wolf, Hoefling, Aponte-Santamaría, Grubmüller, & Groenhof, 2010)  
433 resulting in a system size of ~92 x 88 x 97 Å. A concentration of 150 mM NaCl in the  
434 aqueous solution was used for the single bilayer systems. During equilibration, all protein  
435 heavy atoms were position-restrained with a force constant of 1000 kJ mol<sup>-1</sup> nm<sup>-2</sup> for 5-10  
436 ns. Due to the low degree of internal hydration and medium resolution of the m2r structures  
437 the equilibrations were extended by another 100 ns, now without position restraints, to  
438 enable full hydration of the hydrophilic pocket. To study the active structure, the ligand  
439 carbachol was parameterised using AMBER16, GAFF2, AM1-BCC parameters (Case et al.,  
440 2016), and docked into the orthosteric ligand binding site using GOLD (v5.2.2). A Na<sup>+</sup> ion  
441 was placed into the hydrophilic pocket in the inactive structure. We used a targeted MD  
442 approach with the RMSD to the protein backbone of the active m2r crystal structure (PDB:  
443 4MQT) as a reference, in order to gently enforce the transition from the inactive (PDB:  
444 3UON) to the active state within ~250 ns. The two major conformations of Y440<sup>7.53</sup> we  
445 observed during this simulation were probed systematically in the PMF calculations using

446 distance restraints between  $N^{1.50}-C_{\alpha}$  and  $D^{2.50}-C_{\alpha}$  to  $Y^{7.53}-C_{\zeta}$  or dihedral restraints on the  
447 sidechain of  $Y^{7.53}$ . To keep the G-protein binding site in an active conformation despite the  
448 absence of bound G-protein, we applied a minimal set of four distance restraints to the  $C_{\alpha}$   
449 atoms of the terminal groups of TM helices 2,5,6 and 7, namely residues 2.39-6.33, 2.39-  
450 5.61, 2.43-7.54 and 6.36-7.54, at this interaction site (Fig S6).

451  
452 For the CompEL simulations, the aforementioned active systems were duplicated along the  
453 z axis to construct double bilayer systems. A NaCl gradient of 150mM:10mM between the  
454 extracellular and intracellular compartments was used, along with an ion imbalance of 1 to 2  
455  $Cl^{-}$  ions to generate a  $V_m$  of  $\sim -250$  to  $\sim -500$ mV, as previously described (Kutzner,  
456 Grubmüller, de Groot, & Zachariae, 2011). The  $V_m$  was determined by the GROMACS  
457 utility gmx potential.

458  
459 To calculate the PMF for the  $Na^{+}$  ion within the hydrophilic pocket at neutral  $V_m$ , umbrella  
460 sampling calculations were performed in bins of  $0.25\text{\AA}$  and analysed with the GROMACS  
461 utility gmx wham. We used a simulation time of 50ns in each window and harmonic  
462 potentials of  $900-2000\text{ kJ mol}^{-1}\text{ nm}^{-2}$  to restrain the  $Na^{+}$  ion in the z-direction. The standard  
463 deviation of the PMF profiles was estimated by using the Bayesian bootstrap method, as  
464 implemented in gmx wham, with 200 runs. The free energy of the  $Na^{+}$  ion in bulk solution  
465 was set to 0. The position of the  $Na^{+}$  ion (Z-coordinate) is reported relative to the  $D103^{3.32}-$   
466  $C_{\alpha}$  atom (ligand binding site).

467  
468 For all simulations, the amber99sb\_ildn force field was used for the protein (Lindorff-  
469 Larsen et al., 2010), Berger parameters for lipids (Berger, Edholm, & Jähnig, 1997), which  
470 were adapted for use with the amber99sb force field (Cordomí, Caltabiano, & Pardo, 2012),  
471 and the SPC/E model for water molecules (Berendsen, Grigera, & Straatsma, 1987). Water  
472 bond angles and distances were constrained by SETTLE (Miyamoto & Kollman, 1992)  
473 while all other bonds were constrained using the LINCS method (Hess, Bekker, Berendsen,  
474 & Fraaije, 1997). The temperature and pressure were kept constant throughout the  
475 simulations at 310 K and 1 bar, respectively, with the protein, lipids, and water/ions coupled  
476 individually to a temperature bath by the v-rescale method using a time constant of 0.2 ps  
477 and a semi-isotropic Berendsen barostat (Berendsen, Postma, van Gunsteren, DiNola, &  
478 Haak, 1984; Bussi, Donadio, & Parrinello, 2007). Employing a virtual site model for  
479 hydrogen atoms (Feenstra, Hess, & Berendsen, 1999) allowed the use of 4-fs time steps  
480 during the simulation. All simulations were performed with the GROMACS software  
481 package, version 5.1.2

482  
483 The  $pK_a$  calculations were performed using a continuum electrostatics method, namely the  
484 Poisson-Boltzmann/Monte Carlo (PB/MC) approach, on multiple snapshots taken at a 2 ns  
485 interval from different umbrella sampling simulations. PB calculations were performed  
486 using MEAD (version 2.2.9)(Bashford & Gerwert, 1992) with a dielectric constant ( $\epsilon_p$ ) of 4  
487 for the protein and 80 for the solvent ( $\epsilon_w$ ), in the presence of an explicit membrane. The  
488 temperature was set to 310 K and the ionic strength to 0.145 M. The same temperature was  
489 used for MC calculations ( $10^3$  steps in each calculation), which were performed using

490 MCRP (Baptista, Martel, & Soares, 1999). Each MC step consisted of a cycle of  
491 random choices of a state for all individual sites and pairs of sites with couplings above  
492 2.0 pK<sub>a</sub> units (Baptista et al., 1999), whose acceptance/rejection followed a Metropolis  
493 criterion (Metropolis, Rosenbluth, Rosenbluth, Teller, & Teller, 1953); tautomeric  
494 forms were not included.

495  
496 The GROMACS software package, version 5.0.4 analysis toolkit was used to identify  
497 residues with non-hydrogen heavy atoms within 4 Å of the sodium ion path during the  
498 simulations. The residue conservation profile of the amino acids was obtained from the  
499 GPCRdb server (Isberg et al., 2015).

500

501

502

## 503 **ACKNOWLEDGEMENTS**

504 This work was supported by the BBSRC (Training Grant BB/J013072/1 to U.Z.) and the  
505 Scottish Universities' Physics Alliance (C.A.C, A.V.P. and U.Z.). This research was  
506 partially supported by National Institute of Health grant DA035764 to V.K. We thank  
507 Salomé Llabrés and Daniel Seeliger for fruitful discussions.

508

## 509 **SUPPLEMENTAL INFORMATION**

510

511 Figure S1: Backbone RMSD during a targeted MD simulation from the inactive to the active  
512 state of m2r.

513 Figure S2: Na<sup>+</sup> position during a targeted MD simulation from the inactive to the active  
514 state of m2r.

515 Figure S3: Y440<sup>7.53</sup> conformations used in pK<sub>a</sub> and PMF calculations.

516 Figure S4: Backbone RMSD during MD simulations of the active state m2r under  
517 membrane voltage.

518 Figure S5: Number of hydrogen bonds around the Na<sup>+</sup> binding site.

519 Figure S6: Depiction of the minimal set of distance restraints used to maintain the active  
520 conformation of the m2r at the G-protein binding site.

521 Figure S7: Na<sup>+</sup> ion migration across the receptor to the intracellular side.

522 Table S1. Conservation of the residues in the transmembrane region that were observed to  
523 be in contact (>4.5 Å) with Na<sup>+</sup> in the MD simulations. Overall, the sodium ion was  
524 observed to come into close proximity with 34 residues.

525

526

## 527 **REFERENCES**

528

529 Baptista, A. M., Martel, P. J., & Soares, C. M. (1999). Simulation of Electron-Proton  
530 Coupling with a Monte Carlo Method: Application to Cytochrome c3 Using  
531 Continuum Electrostatics. *Biophysical Journal*, 76(6), 2978–2998.

532 [http://doi.org/10.1016/S0006-3495\(99\)77452-7](http://doi.org/10.1016/S0006-3495(99)77452-7)

533 Bashford, D., & Gerwert, K. (1992). Electrostatic calculations of the pK<sub>a</sub> values of

- 534 ionizable groups in bacteriorhodopsin. *Journal of Molecular Biology*, 224(2), 473–486.  
535 [http://doi.org/10.1016/0022-2836\(92\)91009-E](http://doi.org/10.1016/0022-2836(92)91009-E)
- 536 Beckstein, O., Biggin, P. C., Bond, P., Bright, J. N., Domene, C., Grottesi, A., ... Sansom,  
537 M. S. P. (2003). Ion channel gating: Insights via molecular simulations. *FEBS Letters*,  
538 555(1), 85–90. [http://doi.org/10.1016/S0014-5793\(03\)01151-7](http://doi.org/10.1016/S0014-5793(03)01151-7)
- 539 Ben-Chaim, Y., Chanda, B., Dascal, N., Bezanilla, F., Parnas, I., & Parnas, H. (2006).  
540 Movement of “gating charge” is coupled to ligand binding in a G-protein-coupled  
541 receptor. *Nature*, 444(7115), 106–9. <http://doi.org/10.1038/nature05259>
- 542 Berendsen, H. J. C., Grigera, J. R., & Straatsma, T. P. (1987). The Missing Term in  
543 Effective Pair Potentials. *Journal of Physical Chemistry*, 91(24), 6269–6271.  
544 <http://doi.org/10.1021/j100308a038>
- 545 Berendsen, H. J. C., Postma, J. P. M., van Gunsteren, W. F., DiNola, A., & Haak, J. R.  
546 (1984). Molecular dynamics with coupling to an external bath. *The Journal of*  
547 *Chemical Physics*, 81, 3684–3690. <http://doi.org/10.1063/1.448118>
- 548 Berger, O., Edholm, O., & Jähnig, F. (1997). Molecular dynamics simulations of a fluid  
549 bilayer of dipalmitoylphosphatidylcholine at full hydration, constant pressure, and  
550 constant temperature. *Biophysical Journal*, 72(May 1997), 2002–2013.  
551 [http://doi.org/10.1016/S0006-3495\(97\)78845-3](http://doi.org/10.1016/S0006-3495(97)78845-3)
- 552 Bussi, G., Donadio, D., & Parrinello, M. (2007). Canonical sampling through velocity  
553 rescaling. *Journal of Chemical Physics*, 126. <http://doi.org/10.1063/1.2408420>
- 554 Case, D., Betz, R., Botello-Smith, W., Cerutti, D. S., Cheatham, T. E., Darden, T. A., ...  
555 Kollman, P. A. (2016). Amber 2016. University of California, San Francisco.
- 556 Christopher, J. A., Brown, J., Doré, A. S., Errey, J. C., Koglin, M., Marshall, F. H., ...  
557 Congreve, M. (2013). Biophysical Fragment Screening of the  $\beta$  1 -Adrenergic  
558 Receptor: Identification of High Affinity Arylpiperazine Leads Using Structure-Based  
559 Drug Design. *Journal of Medicinal Chemistry*, 56(9), 3446–3455.  
560 <http://doi.org/10.1021/jm400140q>
- 561 Cordero, A., Caltabiano, G., & Pardo, L. (2012). Membrane protein simulations using  
562 AMBER force field and Berger lipid parameters. *Journal of Chemical Theory and*  
563 *Computation*, 8, 948–958. <http://doi.org/10.1021/ct200491c>
- 564 DeVree, B. T., Mahoney, J. P., Vélez-Ruiz, G. A., Rasmussen, S. G. F., Kuszak, A. J.,  
565 Edwald, E., ... Sunahara, R. K. (2016). Allosteric coupling from G protein to the  
566 agonist-binding pocket in GPCRs. *Nature*, 535(7610), 182–6.  
567 <http://doi.org/10.1038/nature18324>
- 568 Dill, K. A., & Bromberg, S. (2011). *Molecular Driving Force. Statistical Thermodynamics*  
569 *in Chemistry*. <http://doi.org/10.1093/bib/4.4.382>
- 570 Dong, H., Fiorin, G., Carnevale, V., Treptow, W., & Klein, M. L. (2013). Pore waters  
571 regulate ion permeation in a calcium release-activated calcium channel. *Proceedings of*  
572 *the National Academy of Sciences of the United States of America*, 110, 17332–7.  
573 <http://doi.org/10.1073/pnas.1316969110>
- 574 Dror, R. O., Mildorf, T. J., Hilger, D., Manglik, A., Borhani, D. W., Arlow, D. H., ... Shaw,  
575 D. E. (2015). Structural basis for nucleotide exchange in heterotrimeric G proteins.  
576 *Science*, 348(6241), 1361–1365. <http://doi.org/10.1126/science.aaa5264>
- 577 Feenstra, K. A., Hess, B., & Berendsen, H. J. C. (1999). Improving efficiency of large time-  
578 scale molecular dynamics simulations of hydrogen-rich systems. *Journal of*  
579 *Computational Chemistry*, 20(8), 786–798. [http://doi.org/10.1002/\(SICI\)1096-987X\(199906\)20:8<786::AID-JCC5>3.0.CO;2-B](http://doi.org/10.1002/(SICI)1096-987X(199906)20:8<786::AID-JCC5>3.0.CO;2-B)
- 580
- 581 Fenalti, G., Giguere, P. M., Katritch, V., Huang, X.-P., Thompson, A. a, Cherezov, V., ...  
582 Stevens, R. C. (2014). Molecular control of  $\delta$ -opioid receptor signalling. *Nature*,  
583 506(7487), 191–196. <http://doi.org/10.1038/nature12944>



- 584 Haga, K., Kruse, A. C., Asada, H., Yurugi-Kobayashi, T., Shiroishi, M., Zhang, C., ...  
585 Kobayashi, T. (2012). Structure of the human M2 muscarinic acetylcholine receptor  
586 bound to an antagonist. *Nature*, 482(7386), 547–551.  
587 <http://doi.org/10.1038/nature10753>
- 588 Heifetz, A., James, T., Morao, I., Bodkin, M. J., & Biggin, P. C. (2016). Guiding lead  
589 optimization with GPCR structure modeling and molecular dynamics. *Current Opinion*  
590 *in Pharmacology*, 30, 14–21. <http://doi.org/10.1016/j.coph.2016.06.004>
- 591 Hess, B., Bekker, H., Berendsen, H. J. C., & Fraaije, J. G. E. M. (1997). LINCS: A linear  
592 constraint solver for molecular simulations. *Journal of Computational Chemistry*,  
593 18(12), 1463–1472. [http://doi.org/10.1002/\(SICI\)1096-987X\(199709\)18:12<1463::AID-JCC4>3.0.CO;2-H](http://doi.org/10.1002/(SICI)1096-987X(199709)18:12<1463::AID-JCC4>3.0.CO;2-H)
- 595 Huang, W., Manglik, A., Venkatakrisnan, A. J., Laeremans, T., Feinberg, E. N., Sanborn,  
596 A. L., ... Kobilka, B. K. (2015). Structural insights into  $\mu$ -opioid receptor activation.  
597 *Nature*, 524(7565), 315–321. <http://doi.org/10.1038/nature14886>
- 598 Irannejad, R., Tomshine, J. C., Tomshine, J. R., Chevalier, M., Mahoney, J. P., Steyaert, J.,  
599 ... von Zastrow, M. (2013). Conformational biosensors reveal GPCR signalling from  
600 endosomes. *Nature*, 495(7442), 534–538. <http://doi.org/10.1038/nature12000>
- 601 Isberg, V., de Graaf, C., Bortolato, A., Cherezov, V., Katritch, V., Marshall, F. H., ...  
602 Gloriam, D. E. (2015). Generic GPCR residue numbers – aligning topology maps while  
603 minding the gaps. *Trends in Pharmacological Sciences*, 36(1), 22–31.  
604 <http://doi.org/10.1016/j.tips.2014.11.001>
- 605 Isom, D. G., & Dohlman, H. G. (2015). Buried ionizable networks are an ancient hallmark  
606 of G protein-coupled receptor activation. *Proceedings of the National Academy of*  
607 *Sciences*, 2015, 201417888. <http://doi.org/10.1073/pnas.1417888112>
- 608 Kandel, E. R., Schwartz, J. H., & Jessell, T. M. (2000). *Principles of Neural Science*.  
609 *Mcgraw-Hill Publ.Comp.* (Vol. 3). <http://doi.org/10.1036/0838577016>
- 610 Katritch, V., Cherezov, V., & Stevens, R. C. (2013). Structure-function of the G protein-  
611 coupled receptor superfamily. *Annual Review of Pharmacology and Toxicology*, 53,  
612 531–56. <http://doi.org/10.1146/annurev-pharmtox-032112-135923>
- 613 Katritch, V., Fenalti, G., Abola, E. E., Roth, B. L., Cherezov, V., & Stevens, R. C. (2014,  
614 May). Allosteric sodium in class A GPCR signaling. *Trends in Biochemical Sciences*.  
615 Elsevier Ltd. <http://doi.org/10.1016/j.tibs.2014.03.002>
- 616 Kobilka, B. K., & Deupi, X. (2007). Conformational complexity of G-protein-coupled  
617 receptors. *Trends in Pharmacological Sciences*, 28(8), 397–406.  
618 <http://doi.org/10.1016/j.tips.2007.06.003>
- 619 Kruse, A. C., Hu, J., Pan, A. C., Arlow, D. H., Rosenbaum, D. M., Rosemond, E., ...  
620 Kobilka, B. K. (2012). Structure and dynamics of the M3 muscarinic acetylcholine  
621 receptor. *Nature*. <http://doi.org/10.1038/nature10867>
- 622 Kruse, A. C., Ring, A. M., Manglik, A., Hu, J., Hu, K., Eitel, K., ... Kobilka, B. K. (2013).  
623 Activation and allosteric modulation of a muscarinic acetylcholine receptor. *Nature*,  
624 504(7478), 101–106. <http://doi.org/10.1038/nature12735>
- 625 Kutzner, C., Grubmüller, H., de Groot, B. L., & Zachariae, U. (2011). Computational  
626 electrophysiology: the molecular dynamics of ion channel permeation and selectivity in  
627 atomistic detail. *Biophysical Journal*, 101(4), 809–17.  
628 <http://doi.org/10.1016/j.bpj.2011.06.010>
- 629 Kutzner, C., Köpfer, D. A., Machtens, J., Groot, B. L. De, Song, C., & Zachariae, U. (2016).  
630 *Biochimica et Biophysica Acta* Insights into the function of ion channels by  
631 computational electrophysiology simulations. *BBA - Biomembranes*.  
632 <http://doi.org/10.1016/j.bbamem.2016.02.006>
- 633 Lindorff-Larsen, K., Piana, S., Palmo, K., Maragakis, P., Klepeis, J. L., Dror, R. O., &



- 634 Shaw, D. E. (2010). Improved side-chain torsion potentials for the Amber ff99SB  
635 protein force field. *Proteins*, 78(8), 1950–8. <http://doi.org/10.1002/prot.22711>
- 636 Liu, W., Chun, E., Thompson, A. a, Chubukov, P., Xu, F., Katritch, V., ... Stevens, R. C.  
637 (2012). Structural Basis for Allosteric Regulation of GPCRs by Sodium Ions. *Science*,  
638 337(6091), 232–236. <http://doi.org/10.1126/science.1219218>
- 639 Maguire, M. E., Van Arsdale, P. M., & Gilman, a G. (1976). An agonist-specific effect of  
640 guanine nucleotides on binding to the beta adrenergic receptor. *Molecular*  
641 *Pharmacology*, 12, 335–339.
- 642 Mahaut-Smith, M. P., Martinez-Pinna, J., & Gurung, I. S. (2008, August). A role for  
643 membrane potential in regulating GPCRs? *Trends in Pharmacological Sciences*.  
644 <http://doi.org/10.1016/j.tips.2008.05.007>
- 645 Mahoney, J. P., & Sunahara, R. K. (2016). Mechanistic insights into GPCR-G protein  
646 interactions. *Current Opinion in Structural Biology*, 41, 247–254.  
647 <http://doi.org/10.1016/j.sbi.2016.11.005>
- 648 Martinez-Pinna, J., Tolhurst, G., Gurung, I. S., Vandenberg, J. I., & Mahaut-Smith, M. P.  
649 (2004). Sensitivity limits for voltage control of P2Y receptor-evoked Ca<sup>2+</sup> mobilization  
650 in the rat megakaryocyte. *The Journal of Physiology*, 555(Pt 1), 61–70.  
651 <http://doi.org/10.1113/jphysiol.2003.056846>
- 652 Massink, A., Gutierrez-de-Teran, H., Lenselink, E. B., Ortiz Zacarias, N. V., Xia, L.,  
653 Heitman, L. H., ... IJzerman, A. P. (2015). Sodium Ion Binding Pocket Mutations and  
654 Adenosine A2A Receptor Function. *Molecular Pharmacology*, 87(2), 305–313.  
655 <http://doi.org/10.1124/mol.114.095737>
- 656 Metropolis, N., Rosenbluth, A. W., Rosenbluth, M. N., Teller, A. H., & Teller, E. (1953).  
657 Equation of state calculations by fast computing machines. *Journal Chemical Physics*.  
658 <http://doi.org/http://dx.doi.org/10.1063/1.1699114>
- 659 Miao, Y., Caliman, A. D., & McCammon, J. A. (2015). Allosteric Effects of Sodium Ion  
660 Binding on Activation of the M3 Muscarinic G-Protein-Coupled Receptor. *Biophysical*  
661 *Journal*, 108(7), 1796–1806. <http://doi.org/10.1016/j.bpj.2015.03.003>
- 662 Miller-Gallacher, J. L., Nehmé, R., Warne, T., Edwards, P. C., Schertler, G. F. X., Leslie, A.  
663 G. W., & Tate, C. G. (2014). The 2.1 Å Resolution Structure of Cyanopindolol-Bound  
664 β1-Adrenoceptor Identifies an Intramembrane Na<sup>+</sup> Ion that Stabilises the Ligand-Free  
665 Receptor. *PLoS One*, 9(3), e92727. <http://doi.org/10.1371/journal.pone.0092727>
- 666 Miyamoto, S., & Kollman, P. A. (1992). SETTLE: an analytical version of the SHAKE and  
667 RATTLE algorithm for rigid water models. *Journal of Computational Chemistry*, 13,  
668 952–962. <http://doi.org/10.1002/jcc.540130805>
- 669 Moreno-Galindo, E. G., Alamilla, J., Sanchez-Chapula, J. A., Tristani-Firouzi, M., &  
670 Navarro-Polanco, R. A. (2016). The agonist-specific voltage dependence of M2  
671 muscarinic receptors modulates the deactivation of the acetylcholine-gated K<sup>+</sup> current  
672 (I<sub>KACH</sub>). *Pflügers Archiv - European Journal of Physiology*.  
673 <http://doi.org/10.1007/s00424-016-1812-y>
- 674 Navarro-Polanco, R. a, Moreno Galindo, E. G., Ferrer-Villada, T., Arias, M., Rigby, J. R.,  
675 Sánchez-Chapula, J. a, & Tristani-Firouzi, M. (2011). Conformational changes in the  
676 M2 muscarinic receptor induced by membrane voltage and agonist binding. *The*  
677 *Journal of Physiology*, 589(Pt 7), 1741–1753.  
678 <http://doi.org/10.1113/jphysiol.2010.204107>
- 679 Overington, J. P., Al-Lazikani, B., & Hopkins, A. L. (2006). How many drug targets are  
680 there? *Nature Reviews. Drug Discovery*, 5(12), 993–6. <http://doi.org/10.1038/nrd2199>
- 681 Pardo, L., Deupi, X., Dölker, N., López-Rodríguez, M. L., & Campillo, M. (2007). The role  
682 of internal water molecules in the structure and function of the rhodopsin family of G  
683 protein-coupled receptors. *ChemBioChem*. <http://doi.org/10.1002/cbic.200600429>

- 684 Pert, C. B., & Synder, S. H. (1974). Opiate Receptor Binding of Agonists and Antagonists  
685 Affected Differentially by Sodium. *Molecular Pharmacology*, 10(6), 868–879.
- 686 Pierce, K. L., Premont, R. T., & Lefkowitz, R. J. (2002). Seven-transmembrane receptors.  
687 *Nature Reviews. Molecular Cell Biology*, 3(September), 639–650.  
688 <http://doi.org/10.1038/nrm908>
- 689 Quitterer, U., AbdAlla, S., Jarnagin, K., & Müller-Esterl, W. (1996). Na<sup>+</sup> ions binding to  
690 the bradykinin B2 receptor suppress agonist-independent receptor activation.  
691 *Biochemistry*, 35(41), 13368–77. <http://doi.org/10.1021/bi961163w>
- 692 Ranganathan, A., Dror, R. O., & Carlsson, J. (2014). Insights into the Role of Asp79<sup>2.50</sup> in  
693  $\beta$ 2 Adrenergic Receptor Activation from Molecular Dynamics Simulations.  
694 *Biochemistry*, 53(46), 7283–7296. <http://doi.org/10.1021/bi5008723>
- 695 Rask-Andersen, M., Masuram, S., & Schiöth, H. B. (2014). The Druggable Genome:  
696 Evaluation of Drug Targets in Clinical Trials Suggests Major Shifts in Molecular Class  
697 and Indication. *Annual Review of Pharmacology and Toxicology*, 54(1), 9–26.  
698 <http://doi.org/10.1146/annurev-pharmtox-011613-135943>
- 699 Rasmussen, S. G. F., DeVree, B. T., Zou, Y., Kruse, A. C., Chung, K. Y., Kobilka, T. S., ...  
700 Kobilka, B. K. (2011). Crystal structure of the  $\beta$ 2 adrenergic receptor-Gs protein  
701 complex. *Nature*, 477(7366), 549–55. <http://doi.org/10.1038/nature10361>
- 702 Rinne, A., Mobarec, J. C., Mahaut-Smith, M., Kolb, P., & Bunemann, M. (2015). The mode  
703 of agonist binding to a G protein-coupled receptor switches the effect that voltage  
704 changes have on signaling. *Science Signaling*, 8(401), ra110-ra110.  
705 <http://doi.org/10.1126/scisignal.aac7419>
- 706 Šali, A., & Blundell, T. L. (1993). Comparative Protein Modelling by Satisfaction of Spatial  
707 Restraints. *Journal of Molecular Biology*, 234(3), 779–815.  
708 <http://doi.org/10.1006/jmbi.1993.1626>
- 709 Selent, J., Sanz, F., Pastor, M., & de Fabritiis, G. (2010). Induced effects of sodium ions on  
710 dopaminergic G-protein coupled receptors. *PLoS Computational Biology*, 6(8).  
711 <http://doi.org/10.1371/journal.pcbi.1000884>
- 712 Selley, D. E., Cao, C. C., Liu, Q., & Childers, S. R. (2000). Effects of sodium on agonist  
713 efficacy for G-protein activation in mu-opioid receptor-transfected CHO cells and rat  
714 thalamus. *British Journal of Pharmacology*, 130(5), 987–996.  
715 <http://doi.org/10.1038/sj.bjp.0703382>
- 716 Shang, Y., Lerouzic, V., Schneider, S., Bisignano, P., Pasternak, G. W., & Filizola, M.  
717 (2014). Mechanistic insights into the allosteric modulation of opioid receptors by  
718 sodium ions. *Biochemistry*, 53(31), 5140–9. <http://doi.org/10.1021/bi5006915>
- 719 Thomsen, A. R. B., Plouffe, B., Cahill, T. J., Shukla, A. K., Tarrasch, J. T., Dosey, A. M.,  
720 ... Lefkowitz, R. J. (2016). GPCR-G Protein-B-Arrestin Super-Complex Mediates  
721 Sustained G Protein Signaling. *Cell*, 166(4), 907–919.  
722 <http://doi.org/10.1016/j.cell.2016.07.004>
- 723 Vanni, S., Neri, M., Tavernelli, I., & Rothlisberger, U. (2010). A Conserved Protonation-  
724 Induced Switch can Trigger “Ionic-Lock” Formation in Adrenergic Receptors. *Journal*  
725 *of Molecular Biology*, 397(5), 1339–1349. <http://doi.org/10.1016/j.jmb.2010.01.060>
- 726 Venkatakrisnan, a J., Deupi, X., Lebon, G., Tate, C. G., Schertler, G. F., & Babu, M. M.  
727 (2013). Molecular signatures of G-protein-coupled receptors. *Nature*, 494(7436), 185–  
728 94. <http://doi.org/10.1038/nature11896>
- 729 Vickery, O. N., Machtens, J.-P., Tamburrino, G., Seeliger, D., & Zachariae, U. (2016).  
730 Structural Mechanisms of Voltage Sensing in G Protein-Coupled Receptors. *Structure*,  
731 24(6), 997–1007. <http://doi.org/10.1016/j.str.2016.04.007>
- 732 Vickery, O. N., Machtens, J.-P., & Zachariae, U. (2016). Membrane potentials regulating  
733 GPCRs: insights from experiments and molecular dynamics simulations. *Current*

- 734 *Opinion in Pharmacology*, 30, 44–50. <http://doi.org/10.1016/j.coph.2016.06.011>
- 735 Wolf, M. G., Hoefling, M., Aponte-Santamaria, C., Grubmüller, H., & Groenhof, G. (2010).  
736 G-membed: Efficient insertion of a membrane protein into an equilibrated lipid bilayer  
737 with minimal perturbation. *Journal of Computational Chemistry*, 31, 2169–2174.  
738 <http://doi.org/10.1002/jcc.21507>
- 739 Yuan, S., Filipek, S., Palczewski, K., & Vogel, H. (2014). Activation of G-protein-coupled  
740 receptors correlates with the formation of a continuous internal water pathway. *Nature*  
741 *Communications*, 5(May), 4733. <http://doi.org/10.1038/ncomms5733>
- 742 Yuan, S., Peng, Q., Palczewski, K., Vogel, H., & Filipek, S. (2016). Mechanistic Studies on  
743 the Stereoselectivity of the Serotonin 5-HT 1A Receptor. *Angewandte Chemie*  
744 *International Edition*, 55(30), 8661–8665. <http://doi.org/10.1002/anie.201603766>
- 745 Zhang, C., Srinivasan, Y., Arlow, D. H., Fung, J. J., Palmer, D., Zheng, Y., ... Kobilka, B.  
746 K. (2012). High-resolution crystal structure of human protease-activated receptor 1.  
747 *Nature*, 492(7429), 387–92. <http://doi.org/10.1038/nature11701>
- 748 Zhu, F., & Hummer, G. (2012). Drying transition in the hydrophobic gate of the GLIC  
749 channel blocks ion conduction. *Biophysical Journal*, 103(2), 219–227.  
750 <http://doi.org/10.1016/j.bpj.2012.06.003>
- 751
